# Supplementary figures and images for: Epistemic Trust Is a Critical Success Factor in Psychosomatic Rehabilitation—Results from a Naturalistic Multi-Center Observational Study
Source: MDPI journal article supplement (doi:10.3390/jcm13010177), 2023-12-28

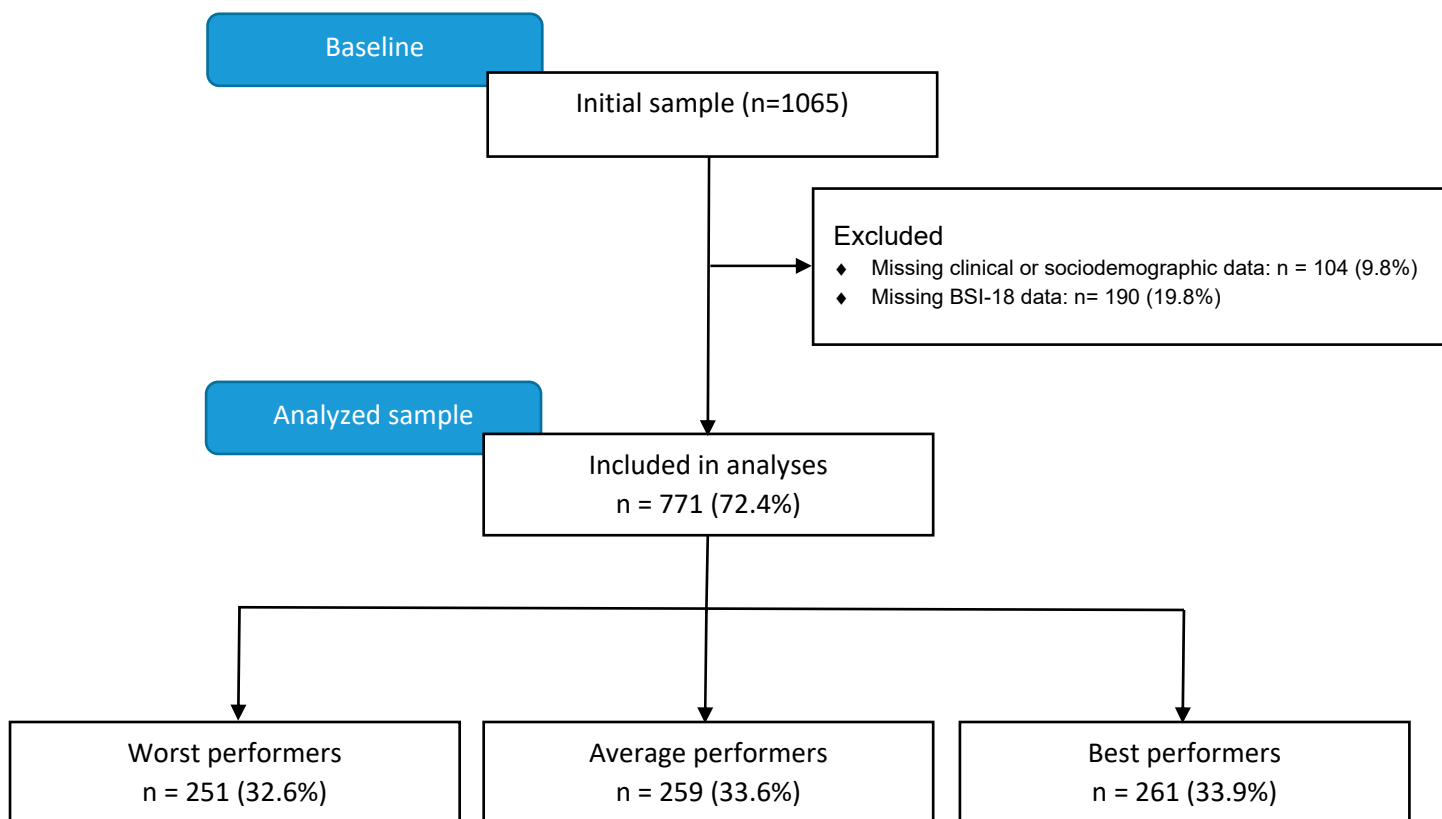

Supplement: s1 [file s1]
